# Supplementary material for: Performance of qualitative and quantitative antigen tests for SARS-CoV-2 in early symptomatic patients using saliva
Source: bioRxiv or medRxiv preprint supplement (doi:10.1101/2020.11.06.20227363), 2020-11-10
Supplement: Supplementary file [file media-1.pdf]

Supplement 1. Raw data in PCR-positive specimens

| Days after<br>symptom onset | specimen | Ct value | Tp value<br>(sec) | CLEIA<br>(pg/mL) | ICA      |
|-----------------------------|----------|----------|-------------------|------------------|----------|
| 2                           | NPS      | 29.56192 | 586               | 40.87            | negative |
| 3                           | NPS      | 12.90119 | 301               | 5000             | positive |
| 4                           | NPS      | 21.74256 | 391               | 685.64           | positive |
| 7                           | NPS      | 18.89330 | 346               | 5000             | positive |
| 7                           | NPS      | 21.52387 | 391               | 487.16           | positive |
| 7                           | NPS      | 25.95481 | 451               | 699.01           | positive |
| 7                           | NPS      | 32.91834 | 661               | 11.62            | negative |
| 8                           | NPS      | 18.88139 | 436               | 2484.37          | positive |
| 9                           | NPS      | 19.76842 | 346               | 5000             | positive |
| 9                           | NPS      | 31.75552 | 646               | 196.65           | positive |
| 10                          | NPS      | 21.75409 | 391               | 422.62           | positive |
| 12                          | NPS      | 31.85005 | 526               | 11.77            | negative |
| 12                          | NPS      | 30.54592 | 601               | 5.34             | negative |
| 12                          | NPS      | 29.77066 | 511               | 15.02            | negative |
| 12                          | NPS      | 28.65936 | 556               | 55.43            | negative |
| 14                          | NPS      | 24.86924 | 406               | 213.09           | positive |
| 14                          | NPS      | 29.59635 | 556               | 10.62            | negative |
| 2                           | saliva   | 19.62641 | 391               | 1357.72          | positive |
| 2                           | saliva   | 21.89011 | 376               | 485.26           | positive |
| 4                           | saliva   | 18.79502 | 511               | 5000             | positive |
| 7                           | saliva   | 28.14606 | 526               | 5.26             | negative |
| 7                           | saliva   | 32.96928 | 751               | 0.19             | negative |
| 7                           | saliva   | 27.62087 | 541               | 1.63             | negative |
| 7                           | saliva   | 28.81459 | 571               | 5.12             | negative |
| 8                           | saliva   | 25.55043 | 436               | 194.68           | negative |
| 9                           | saliva   | 24.40270 | 481               | 102.21           | negative |
| 9                           | saliva   | 29.54057 | 526               | 3.62             | negative |
| 10                          | saliva   | 32.43248 | 496               | 0.47             | negative |
| 12                          | saliva   | 28.90566 | 571               | 1.07             | negative |
| 12                          | saliva   | 27.46050 | 586               | 9.06             | negative |
| 12                          | saliva   | 27.17160 | 616               | 1.98             | negative |
| 12                          | saliva   | 23.80877 | 496               | 164.85           | positive |
| 14                          | saliva   | 33.81876 | 601               | 0.13             | negative |
| 14                          | saliva   | 30.60193 | 601               | 1.12             | negative |

Supplement 2. Antigen concentration by CLEIA in PCR-negative specimens

| Antigen concentration (pg/mL) | Frequency | Antigen concentration (pg/mL) | Frequency |
|-------------------------------|-----------|-------------------------------|-----------|
| 0.01                          | 122       | 0.19                          | 1         |
| 0.02                          | 18        | 0.20                          | 2         |
| 0.03                          | 19        | 0.21                          | 2         |
| 0.04                          | 16        | 0.22                          | 1         |
| 0.05                          | 14        | 0.23                          | 2         |
| 0.06                          | 12        | 0.24                          | 1         |
| 0.07                          | 6         | 0.25                          | 1         |
| 0.08                          | 19        | 0.27                          | 1         |
| 0.09                          | 11        | 0.28                          | 1         |
| 0.10                          | 14        | 0.30                          | 1         |
| 0.11                          | 5         | 0.34                          | 2         |
| 0.12                          | 3         | 0.37                          | 1         |
| 0.13                          | 6         | 0.39                          | 1         |
| 0.14                          | 7         | 0.40                          | 2         |
| 0.15                          | 3         | 0.60                          | 1         |
| 0.16                          | 6         | 0.63                          | 1         |
| 0.17                          | 4         | 8.45 (4.78)*                  | 1         |
| 0.18                          | 1         | 24.23 (16.07)*                | 1         |

\* The antigen concentration at re-test was shown in parenthesis.
